# Supplementary material for: Tuning site-specific dynamics to drive allosteric activation in a pneumococcal zinc uptake regulator
Source: eLife. 2018 Oct 17;7:e37268. doi: 10.7554/eLife.37268 (PMC6224198; doi:10.7554/eLife.37268)
Supplement: Figure 1—source data 1. [file elife-37268-fig1-data1.xlsx]

## Sheet: Sheet1
mth	DOI (structure)	Protein	state/ligand	DNA binding competence	Organism	Method	DNA binding constant (Ka)	DOI (binding)	residues in the loop with pymol ss	minimal distance between helices	angle between helices
1JGS	﻿10.1038/90429	MarR	beonzoic acid	incompetent	E coli	EMSA	NA	﻿10.1073/pnas.92.12.5456	5	12.9	179.79
1LJ9	﻿10.1074/jbc.M300292200	SlyA	apo	competent	E faecalis	RT-PCR	NA	﻿10.1128/IAI.01132-10	3	23.8	136.4
1LNW	10.1074/jbc.M111381200	MexR	apo	competent	P aeruginosa	EMSA	NA	﻿10.1074/jbc.M111381200	5	26.8	146.19
1S3J	NA	YusO	apo	putative competent	Bacillus subtilis	NA	NA	NA	2	34.8	169.4
1Z91	10.1016/j.molcel.2005.09.013	OhrR	C15S reduced form	competent	Bacillus subtilis	﻿DNaseI footprinting data	5x10^9	﻿10.1073/pnas.102483199	1	23.9	178.75
1z9c	10.1016/j.molcel.2005.09.013	OhrR	DNA bound	bound	Bacillus subtilis	NA	NA	NA	3	27.6	145.67
2A61	NA	Tm0710	Apo	putative competent	Thermotoga maritima	NA	NA	NA	3	12.2	157.18
2BV6	10.1038/nchembio820	MgrA	Apo	competent	S aureus	EMSA	NA	﻿10.1038/nchembio820	3	25.9	148.54
2EB7	﻿10.1016/j.jsb.2007.08.017	STK_17100	apo	competent	Sulfolobus tokodaii	polarization	5.3x10^7	﻿10.1021/bi801662s	3	23.4	172.12
2ETH	NA	TM_0816	apo	putative competent	Thermotoga maritima	NA	NA	NA	4	36.4	154.03
2FA5	﻿10.1002/prot.21017	XC1739	apo	competent	Xanthomonas campestris	EMSA	NA	﻿10.1002/prot.21017	3	14	133.24
2fbh	NA	PA3341	Metal?	putative competent	P aeruginosa	NA	NA	NA	8	25.3	150.33
2FBI	NA	PA4135	apo	putative competent	Pseudomonas aeruginosa	NA	NA	NA	5	20.5	152.77
2FBK	﻿10.1016/j.jmb.2006.05.005	HucR	apo	competent	Deinococcus radiodurans	EMSA	3.4x10^9	﻿10.1016/j.jmb.2006.05.005	4	17	133.09
2GXG	NA	EmrR	apo	competent	Sulfolobus tokodaii	EMSA	NA	﻿10.1128/AAC.44.10.2905-2907.2000	3	23.7	174.76
2hr3	NA	PA3067	apo	putative competent	P aeruginosa	NA	NA	NA	3	15.4	177.66
2NNN	NA	PA1603	apo	putative competent	P aeruginosa	NA	NA	NA	6	26.6	149.99
2nyx	NA	RV1404	apo	putative competent	Mycobacterium tuberculosis	NA	NA	NA	5	34.7	141.14
2pex	10.1016/j.molcel.2007.09.016	OhrR	C22S reduced	competent	Xanthamonas Campestris	polarizarion	0.15x10^9	﻿10.1016/j.molcel.2007.09.016	5	28.9	147.26
2pfb	﻿10.1016/j.molcel.2007.09.016	OhrR	oxidized	incompetent	Xanthamonas Campestris	polarizarion	<<10^7	﻿10.1016/j.molcel.2007.09.016	3	32.2	101.85
2QWW	NA	YP_013417.1	apo	putative competent	Listeria monocytogenes serotype 4b str. F2365	NA	NA	NA	2	8.6	159.61
2RDP	NA	RBSTP1228	apo reduced	putative competent	Geobacillus stearothermophilus	NA	NA	NA	4	31.9	166.88
2YR2	﻿10.1016/j.jsb.2007.08.017	STK_17100	Zn bound?	competent	Sulfolobus tokodaii	polarization	5.3x10^7	﻿10.1021/bi801662s	3	20.5	179.76
3BDD	NA	SSU05_1136	apo	putative competent	Streptococcus suis 89/1591	NA	NA	NA	1	28.6	158.1
3BJ6	NA	SPO3579	apo	putative competent	Ruegeria pomeroyi DSS-3	NA	NA	NA	2	24	175.71
3BJA	NA	BCE_2462	apo	putative competent	Bacillus cereus ATCC 10987	NA	NA	NA	1	15	161.31
3BOQ	NA	SPOA0452	apo	putative competent	Ruegeria pomeroyi DSS-3	NA	NA	NA	1	17.5	151.42
3bpv	﻿10.1016/j.jmb.2008.01.001	MarR MTH313	apo	competent	Methanothermobacter marburgensis str. Marburg	EMSA	NA	﻿10.1016/j.jmb.2008.01.001	6	16.3	166.25
3bpx	﻿10.1016/j.jmb.2008.01.001	MarR MTH313	salicilic	incompetent	Methanothermobacter marburgensis str. Marburg	EMSA	NA	﻿10.1016/j.jmb.2008.01.001	6	27.2	160.5
3BRO	NA	OEOE_1854	apo	putative competent	Oenococcus oeni PSU-1	NA	NA	NA	3	29.9	135.08
3CDH	NA	SPO1453	reduced	putative competent	Ruegeria pomeroyi DSS-3	EMSA	NA	﻿10.1111/mmi.12598	2	22.2	149.61
3cjn	NA	SPO1458	apo	putative competent	Ruegeria pomeroyi DSS-3	NA	NA	NA	5	27.9	157.9
3DEU	NA	SlyA	salicilic	incompetent	Salmonella enterica	EMSA	NA	﻿10.1074/jbc.M111.245258	3	29.4	136.33
3E6M	NA	SPOA0451	apo	putative competent	Silicibacter pomeroyi	NA	NA	﻿10.1074/jbc.M115.712067	1	29.9	163.94
3ECH	﻿10.1073/pnas.0805489105	MexR	with ArmR	incompetent	Pseudomonas aeruginosa	EMSA	NA	﻿10.1073/pnas.0805489105	7	15.7	174.8
3ECO	﻿10.1093/nar/gkn1046	MepR	apo	competent	S aureus	polarization	0.16x10^9	﻿10.1093/nar/gkn1046	1	18.9	138.14
3F3X	﻿10.1016/j.jmb.2009.03.030	BldR	apo	competent	Sulfolobus solfataricus	MD	NA	﻿10.1016/j.jmb.2009.03.030	1	29	153.57
3fm5	﻿10.1093/nar/gkv955	CouR	apo	competent	Rhodococcus jostii RHA1	EMSA	NA	﻿10.1093/nar/gkv955	1	27.1	163.25
3G3Z	﻿10.1107/S174430910900414X	NMB1585	apo	competent	Neisseria meningitidis	EMSA	NA	﻿10.1107/S174430910900414X	3	23.3	142.34
3GEZ	﻿10.1093/nar/gkp496	ST1710	apo	competent	Sulfolobus tokodaii	polarization	5.3x10^7	﻿10.1021/bi801662s	3	22.8	173.55
3GF2	﻿10.1093/nar/gkp496	ST1710	sodium salicylate	incompetent	Sulfolobus tokodaii	polarization	NA	﻿10.1021/bi801662s	3	23	171.72
3GFI	﻿10.1093/nar/gkp496	ST1710	DNA not inserted in the major grooves	bound	Sulfolobus tokodaii	NA	NA	NA	1	10.1	165.44
3GFJ	﻿10.1093/nar/gkp496	ST1710	R89A	incompetent	Sulfolobus tokodaii	EMSA	NA	﻿10.1093/nar/gkp496	3	22.2	171.19
3GFL	﻿10.1093/nar/gkp496	ST1710	R90A	incompetent	Sulfolobus tokodaii	EMSA	NA	﻿10.1093/nar/gkp496
3gfm	﻿10.1093/nar/gkp496	ST1710	K91A	incompetent	Sulfolobus tokodaii	EMSA	NA	﻿10.1093/nar/gkp496	3	22.7	170.31
3hrm	﻿10.1074/jbc.M109.015826	SarZ	sulfenic	putative competent	S aureus	NA	NA	NA	1	24.9	156.24
3hse	﻿10.1074/jbc.M109.015826	SarZ	reduced	competent	S aureus	EMSA	0.16x10^9	﻿10.1111/j.1365-2958.2006.05480.x	4	24.6	167.18
3hsr	﻿10.1074/jbc.M109.015826	SarZ	mixed disulfide	incompetent	S aureus	EMSA	NA	﻿10.1111/j.1365-2958.2008.06518.x	3	30.3	141.45
3jw4	NA	CA_C2486	apo	putative competent	Clostridium acetobutylicum	NA	NA	NA	2	24.8	158.45
3K0L	﻿10.1074/jbc.M115.712067	HcaR	apo	competent	Acinetobacter sp. ADP1	EMSA	NA	﻿10.1074/jbc.M115.712067	3	18.7	164.71
3KP2	﻿10.1073/pnas.0913302107	TcaR	PENICILLIN G	incompetent	Staphylococcus epidermidis RP62A	EMSA	NA	﻿10.1073/pnas.0913302107	2	26.4	164.95
3KP3	﻿10.1073/pnas.0913302107	TcaR	ampicillin	incompetent	Staphylococcus epidermidis RP62A	EMSA	NA	﻿10.1073/pnas.0913302107	1	22.5	173.04
3KP4	﻿10.1073/pnas.0913302107	TcaR	methicillin	incompetent	Staphylococcus epidermidis RP62A	EMSA	NA	﻿10.1073/pnas.0913302107	2	21.1	170.7
3kp5	﻿10.1073/pnas.0913302107	TcaR	KAN	incompetent	Staphylococcus epidermidis RP62A	EMSA	NA	﻿10.1073/pnas.0913302107	3	22	166.06
3KP6	﻿10.1073/pnas.0913302107	TcaR	salicilic	incompetent	Staphylococcus epidermidis RP62A	EMSA	NA	﻿10.1073/pnas.0913302107	3	27.6	173.76
3KP7	﻿10.1073/pnas.0913302107	TcaR	apo	competent	Staphylococcus epidermidis RP62A	EMSA	NA	﻿10.1073/pnas.0913302107	1	24.7	176.41
3mex	﻿10.1038/embor.2010.96	MexR	oxidized	incompetent	Pseudomonas aeruginosa	EMSA	NA	﻿10.1073/pnas.0803391105	5	27	146.96
3nqo	NA	CD1569	apo	putative competent	Clostridioides difficile 630	NA	NA	NA	2	24.3	125.21
3NRV	NA	ACIAD1811	apo	putative competent	Acinetobacter sp. ADP1	NA	NA	NA	1	13.4	132.51
3OOP	NA	lin2960	apo	putative competent	Listeria innocua Clip11262	NA	NA	NA	6	39.8	158.45
3Q5F	﻿10.1074/jbc.M111.245258	SlyA	DNA	bound	Salmonella enterica	NA	NA	NA	1	27.8	149.96
3QPT	﻿10.1074/jbc.M111.245258	SlyA	Apo	competent	Salmonella enterica	EMSA	NA	﻿10.1074/jbc.M111.245258	3	15.5	162.35
3S2W	NA	MM_1863	Apo	putative competent	Methanosarcina mazei Go1	NA	NA	NA	3	18.7	159.12
3TGN	﻿10.1021/ja2080532	AdcR	Zn	competent	Streptococcus pneumoniae D39	polarization	0.24x10^9	﻿10.1016/j.jmb.2010.08.030	18	27.6	144.57
3vb2	NA	MarR	reduced	competent	E coli	EMSA	1x10^9	﻿10.1073/pnas.92.12.5456	6		163.75
3vod	﻿10.1038/nchembio.1380	MarR	C80S	competent	E coli	EMSA	NA	﻿10.1038/nchembio.1380	6	8.3	168.72
3voe	NA	MarR	apo	competent	Ecoli	EMSA	1x10^9	﻿10.1073/pnas.92.12.5456	3	8.4	169.58
3ZMD	NA	AbsC	salicilic	putative incompetent	Streptomyces coelicolor	NA	not measured	NA	1	30.8	143.77
3ZPL	﻿10.1093/nar/gkt523	AbsC-like	DNA	bound	Streptomyces coelicolor	NA	NA	NA	1	26.3	137.72
4aih	﻿10.1074/jbc.M112.379156	RovA	apo	competent	Yersinia pseudotuberculosis YPIII	EMSA	0.031x10^9	﻿10.1371/journal.ppat.1000435	3	20.9	150.64
4aij	﻿10.1074/jbc.M112.379156	RovA	DNA	bound	Yersinia pseudotuberculosis YPIII	NA	NA	NA	1	21.8	148.64
4aik	﻿10.1074/jbc.M112.379156	RovA	DNA	bound	Yersinia pseudotuberculosis YPIII	NA	NA	NA	1	21.9	147.63
4B8X	﻿10.1002/prot.24197	Sco5413	apo	putative competent	Streptomyces coelicolor	NA	NA	NA	1	24.3	143.1
4EJT		TcaR	RNA??	bound	Staphylococcus epidermidis RP62A				3	18.3	177.92
4eju	﻿10.1107/S0907444913007117	TcaR	apo	competent	Staphylococcus epidermidis RP62A	EMSA	NA	﻿10.1107/S0907444913007117	3	22.3	173.3
4EJV	﻿10.1107/S0907444913007117	TcaR	chloremphenicol	incompetent	Staphylococcus epidermidis RP62A	EMSA	NA	﻿10.1107/S0907444913007117	3	21.1	166.74
4ejw	﻿10.1107/S0907444913007117	TcaR	streptomycin	incompetent	Staphylococcus epidermidis RP62A	EMSA	NA	﻿10.1107/S0907444913007117	3	18.2	166.88
4em0	﻿10.1107/S0907444913007117	﻿SAR2349	KAN/salicilic	incompetent	Staphylococcus epidermidis RP62A	EMSA	NA	﻿10.1107/S0907444913007117	3	33.1	159.24
4em1	﻿10.1107/S0907444913007117	﻿SAR2349	apo	competent	Staphylococcus epidermidis RP62A	EMSA	NA	﻿10.1107/S0907444913007117	3	31.2	159.66
4em2	﻿10.1107/S0907444913007117	﻿SAR2349	salicilate	putative incompetent	Staphylococcus epidermidis RP62A	NA	NA	NA	3	30.3	157.63
4FHT	﻿10.1093/nar/gkt009	PcaV	PCA	incompetent	Streptomyces coelicolor A3(2)	EMSA	NA	﻿10.1093/nar/gkt009	5	28.2	132.11
4FX0	﻿10.1074/jbc.M112.388611	MosR	oxidized	incompetent	M. tuberculosis	EMSA	NA	﻿10.1074/jbc.M112.388611	3	15.1	142.9
4FX4	﻿10.1074/jbc.M112.388611	MosR	DNA	bound	M. tuberculosis	NA	NA	NA	1	25.1	132.42
4G9Y	﻿10.1093/nar/gkt009	PcaV	apo	competent	Streptomyces coelicolor A3(2)	EMSA	NA	﻿10.1093/nar/gkt009	5	27.4	157.8
4gxo	10.1073/pnas.1205952109	SarZ	C13E apo	incompetent	S aureus	EMSA	9x10^6	10.1073/pnas.1205952109	5	21.9	152.01
4hbl	﻿10.1074/jbc.M112.426205	AbfR	apo/reduced	competent	Staphylococcus epidermidis RP62A	EMSA	NA	﻿10.1074/jbc.M112.426205	3	37	129.51
4JBA	﻿10.1038/nchembio.1380	MarR	oxidized	incompetent	E coli	EMSA	NA	﻿10.1038/nchembio.1380	3	12	161.53
4KDP	﻿10.1093/nar/gku128	TcaR	ssDNA	bound	Staphylococcus epidermidis	NA	NA	NA	3	19.1	165.91
4l9j	﻿10.1128/mBio.00528-13	MepR	Apo	competent	S aureus	ITC	0.027x10^9	﻿10.1128/mBio.00528-13	1	27.9	146.63
4L9N	﻿10.1128/mBio.00528-13	MepR A103V	apo A103V inhibited	incompetent	Staphylococcus aureus	ITC	1x10^6	﻿10.1128/mBio.00528-13	3	16.9	146.65
4L9T	﻿10.1128/mBio.00528-13	MepR F27L	apo F27L inhibited	incompetent	Staphylococcus aureus	ITC	0.8x10^6	﻿10.1128/mBio.00528-13	2	30.8	118.18
4L9V	﻿10.1128/mBio.00528-13	MepR F27L	apo F27L inhibited	incompetent	Staphylococcus aureus	ITC	0.8x10^6	﻿10.1128/mBio.00528-13	3	57.9	170.34
4LD5	﻿10.1128/mBio.00528-13	MepR	q18p inhibited	incompetent	Staphylococcus aureus	ITC	0.016x10^6	﻿10.1128/mBio.00528-13	2	46.8	161.68
4LLL	﻿10.1093/nar/gkt1215	MepR	DNA	bound	Staphylococcus aureus	NA	NA	NA	6	26.4	142.63
4LLN	﻿10.1093/nar/gkt1215	MepR	DNA	bound	S aureus	NA	NA	NA	3	26.9	139.88
4MNU	NA	SlyA	Apo	putative competent	Listeria monocytogenes EGD-e	NA	NA	NA	9	20	138.23
4rgr	﻿10.1074/jbc.M115.712067	HcaR	PARA-COUMARIC ACID	incompetent	Acinetobacter sp. ADP1	EMSA	NA	﻿10.1074/jbc.M115.712067	1	19.2	172.22
4rgs	﻿10.1074/jbc.M115.712067	HcaR	vanilin	putative incompetent	Acinetobacter sp. ADP1	NA	NA	﻿10.1074/jbc.M115.712067	1	19.5	172.29
4rgu	﻿10.1074/jbc.M115.712067	HcaR	ferulic acid	putative incompetent	Acinetobacter sp. ADP1	NA	NA	﻿10.1074/jbc.M115.712067	3	19.8	170.16
4rgx	﻿10.1074/jbc.M115.712067	HcaR	3,4-dihydroxy bezoic acid	putative incompetent	Acinetobacter sp. ADP1	NA	NA	﻿10.1074/jbc.M115.712067	3	19.1	172.11
4XRF	NA	BC_0657	ligand?	putative competent	Bacillus cereus ATCC 14579	NA	NA	NA	7	45.9	110.99
4yif	﻿10.1107/S2053230X15007281	Rv0880	apo	putative competent	Mycobacterium tuberculosis H37Rv	NA	NA	﻿10.1038/nmicrobiol.2016.78	7	23.5	166.71
4ZZL	﻿10.1016/j.str.2016.06.008	MexR	R21W	incompetent	Pseudomonas aeruginosa	RTPCR	NA	﻿10.1002/pro.343	3	30.1	139.37
5AIP	﻿10.1371/journal.ppat.1005557	NadR	4-hydroxyphenylacetate	incompetent	Neisseria meningitidis serogroup B	protein expression	NA	﻿10.1371/journal.ppat.1005557	2	20.5	166.91
5AIQ	﻿10.1371/journal.ppat.1005557	NadR	apo	competent	Neisseria meningitidis serogroup B	protein expression	NA	﻿10.1371/journal.ppat.1005557	3	18	155.41
5bmz	﻿10.1074/jbc.M115.712067	HcaR	DNA	bound	Acinetobacter sp. ADP1	NA	NA	NA	3	28.6	165.87
5cyv	﻿10.1093/nar/gkv955	CouR	p-coumaroyl-CoA	incompetent	Rhodococcus jostii RHA1	EMSA	NA	﻿10.1093/nar/gkv955	1	26.1	151.18
5dd8	﻿10.1039/C6MB00304D	HucR	E48Q, active?	competent	Deinococcus radiodurans	EMSA	0.7x10^9	﻿10.1039/C6MB00304D	5	17.6	141.11
5E1W	NA	RdhR	apo	putative competent	Dehalococcoides mccartyi CBDB1	NA	NA	NA	3	23.6	125.38
5e1x	NA	RdhR	3,4-dichlorophenol	putative incompetent	Dehalococcoides mccartyi BTF08	NA	NA	NA	3	23.1	124.9
5E1Z	NA	RdhR-CbdbA1625	2,4-dichlorophenol	putative incompetent	Dehalococcoides mccartyi BTF08	NA	NA	NA	6	28.6	125.66
5e20	NA	RdhR-CbdbA1625	2,3-dichlorophenol	putative incompetent	Dehalococcoides mccartyi CBDB1	NA	NA	NA	6	29	125.63
5ERI	﻿10.1107/S2053230X1700766X	MarRC.difficile	apo	putative competent	Clostridioides difficile	NA	NA	NA	8	28.3	139.64
5F6F	NA	MepR G34R	G34R	putative incompetent	Staphylococcus aureus	NA	NA	NA	4	53	175.37
5FB2	NA	MepR F27L	oligodeoxyribonucleotide	incompetent	Staphylococcus aureus	ITC	0.8x10^6	﻿10.1128/mBio.00528-13	6	21.8	140.45
5ffx	NA	MepR	G43K	putative incompetent	S aureus	NA	NA	NA	9	20	141.19
5FFZ	NA	MepR	ethidium bromide	putative incompetent	Staphylococcus aureus	NA	NA	NA	5	58.9	179.96
5H3R	10.1007/s00775-017-1442-7	Ec MarR	DNA	bound	E coli	NA	NA	NA		29	145.82
5HLG	﻿10.1021/jacs.6b11438	AbfR	DNA reduced	bound	Staphylococcus epidermidis	NA	NA	NA	3	29.9	146.43
5HLH	﻿10.1021/jacs.6b11438	AbfR	DNA overoxidized	bound	Staphylococcus epidermidis	NA	NA	NA	3	30	152.48
5HLI	﻿10.1021/jacs.6b11438	AbfR	disulfide	incompetent	Staphylococcus epidermidis	EMSA	0.14x10^6	﻿10.1021/jacs.6b11438	1	40.7	171.83
5HSM	﻿10.1038/s41598-017-01705-4	RV2887	apo	competent	Mycobacterium tuberculosis H37Rv	EMSA	NA	﻿10.1038/s41598-017-01705-4	1	8.3	167.86
5HSO	﻿10.1038/s41598-017-01705-4	RV2887	DNA	bound	Mycobacterium tuberculosis	na	na	na	1	22.5	166.08
5jls		AdcR	Zn	competent	Streptococcus pyogenes serotype M3	RT-PCR	NA	﻿10.1016/j.ebiom.2017.05.030	16	34	94.45
5jlu		AdcR	Zn	competent	Streptococcus pyogenes serotype M4	RT-PCR	NA	﻿10.1016/j.ebiom.2017.05.030	15	33.8	102.2
5X80	﻿10.1038/s41598-017-01705-4	RV2887	SA complex	incompetent	Mycobacterium tuberculosis	EMSA	NA	﻿10.1038/s41598-017-01705-4	1	7.8	179.86
5X7Z	﻿10.1038/s41598-017-01705-4	RV2887	PAS complex	incompetent	Mycobacterium tuberculosis	EMSA	NA	﻿10.1038/s41598-017-01705-4	3	7.8	178.2
5yhx	﻿10.1073/pnas.1708563115	ZitR	WT Zn	competent	Lactococcus lactis	polarization	0.38x10^9	﻿10.1073/pnas.1708563115	18	35.5	136.03
5yi2	﻿10.1073/pnas.1708563115	ZitR	DNA-WT	bound	Lactococcus lactis	NA	NA	NA	18	32.3	147.48
5yhy	﻿10.1073/pnas.1708563115	ZitR	c30S	competent	Lactococcus lactis	polarization	0.05x10^9	﻿10.1073/pnas.1708563115	18	54	114.28
5yi3	﻿10.1073/pnas.1708563115	ZitR	DNA-C30S	bound	Lactococcus lactis	NA	NA	NA	18	31.7	144.47
5yhz	﻿10.1073/pnas.1708563115	ZitR	Zn-E41A	competent	Lactococcus lactis	polarization	0.0185x10^9	﻿10.1073/pnas.1708563115	18	50.2	110.17
5yi0	﻿10.1073/pnas.1708563115	ZitR	Zn-C30AH42A	incompetent	Lactococcus lactis	polarization	0.8x10^4	﻿10.1073/pnas.1708563115	16	59.6	112.96
5yi1	﻿10.1073/pnas.1708563115	ZitR	Apo-C30AH42A	incompetent	Lactococcus lactis	polarization	0.8x10^4	﻿10.1073/pnas.1708563115	17	57.3	113.6
